# Supplementary material for: Genome-wide identification of Apetala2 gene family in Hypericum perforatum L and expression profiles in response to different abiotic and hormonal treatments
Source: PeerJ. 2023 Aug 28;11:e15883. doi: 10.7717/peerj.15883 (PMC10470449; doi:10.7717/peerj.15883)
Supplement: Supplemental Information 4 [file peerj-11-15883-s004.xlsx]

## Sheet: Sheet1
Sequence	Method	Ka	Ks	Ka/Ks	P-Value(Fisher)	Length	S-Sites	N-Sites	Fold-Sites(0:2:4)	Substitutions	S-Substitutions	N-Substitutions	Fold-S-Substitutions(0:2:4)	Fold-N-Substitutions(0:2:4)	Divergence-Time	Substitution-Rate-Ratio(rTC:rAG:rTA:rCG:rTG:rCA/rCA)	GC(1:2:3)	ML-Score	AICc	Akaike-Weight	Model
HPAP2_1&HPAP2_18	YN	1.01498	0.943586	1.07566	0.042379	1782	373.828	1408.17	NA	1300	257.329	1042.67	NA	NA	1	1:1:1:1:1:1	0.485889(0.477636:0.444888:0.535144)	-4855.82	9715.67	0.527016	F81
HPAP2_2&HPAP2_9	YN	5.23239	1.70271	3.07298	6.10005e-05	1422	350.812	1071.19	NA	1071	235.934	835.066	NA	NA	4.36161	2:2:1:1:1:1	0.423855(0.416933:0.379393:0.47524)	NA	NA	NA	NA
HPAP2_3&HPAP2_13	YN	0.22087	0.290331	0.760751	0.0392671	1872	389.431	1482.57	NA	376	92.8717	283.128	NA	NA	0.23532	1.04044:1.04044:1:1:1:1	0.517039(0.497604:0.46885:0.584665)	NA	NA	NA	NA
HPAP2_4&HPAP2_6	YN	0.984365	1.05336	0.934503	0.111087	1227	278.073	948.927	NA	882	210.552	671.448	NA	NA	1	1.22617:1.1642:1.28113:1.28263:1.33793:1	0.41325(0.428699:0.383244:0.427807)	-3353.58	NA	NA	NA
HPAP2_7&HPAP2_21	YN	0.00156375	0.0229118	0.0682511	7.79718e-05	1680	399.645	1280.36	NA	11	9	2	NA	NA	0.00664211	2.04256:2.04256:1:1:1:1	0.505776(0.5:0.432343:0.584983)	NA	NA	NA	NA
HPAP2_8&HPAP2_12	YN	0.00503214	0.0381498	0.131905	0.000342103	1068	269.91	798.09	NA	14	10	4	NA	NA	0.0134018	2.03845:2.03845:1:1:1:1	0.27476(0.253195:0.26278:0.308307)	NA	NA	NA	NA
HPAP2_14&HPAP2_16	YN	1.01397	0.947051	1.07066	0.108765	1788	373.317	1414.68	NA	1190	235.304	954.696	NA	NA	1	1.07691:1.07723:1.16628:1.16663:1.29643:1	0.484873(0.495875:0.468647:0.490099)	-4758.94	NA	NA	NA
HPAP2_19&HPAP2_20	YN	0.98312	1.06774	0.920751	0.0851321	1023	204.07	818.93	NA	724	154.208	569.792	NA	NA	1	0.848537:0.848537:1:1:1:1	0.296755(0.30198:0.272277:0.316007)	-2786.08	5578.23	NA	HKY
